# Supplementary material for: Probing the binding behavior and kinetics of silver nanoparticles with bovine serum albumin
Source: Royal Society of Chemistry journal article supplement (doi:10.1039/c6ra26089f), 2017-01-01
Supplement: c6ra26089f1.pdf [file c6ra26089f1.pdf]

## Probing the binding behaviors and kinetics of silver nanoparticles with bovine serum albumin

Gongke Wang<sup>\*a</sup>, Yanfang Lu<sup>a</sup>, Huimin Hou<sup>a</sup>, Yufang Liu<sup>\*b</sup>

<sup>a</sup>School of Chemistry and Chemical Engineering, Key Laboratory of Green Chemical Media and Reactions, Ministry of Education, Collaborative Innovation Center of Henan Province for Green Manufacturing of Fine Chemicals, Henan Normal University, Xinxiang, Henan 453007, P. R. China

<sup>b</sup>School of Physics and Materials Science, Henan Normal University, Xinxiang, Henan 453007, P. R. China

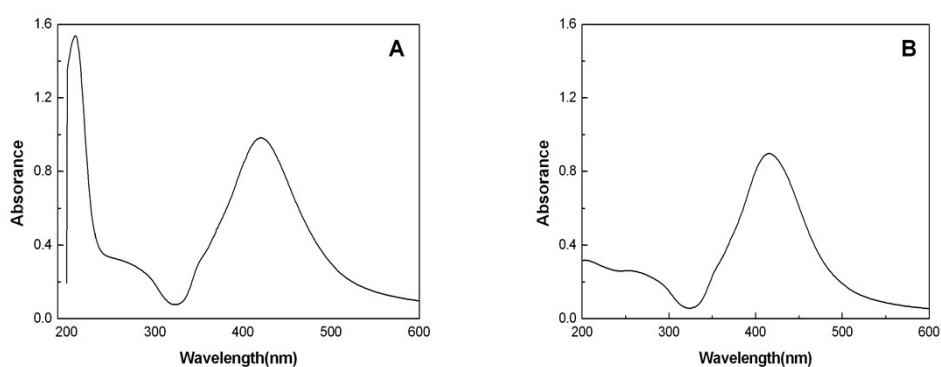

Fig. S1. The absorption spectrum of AgNPs. (A) freshly prepared. (B) after centrifugal processing.

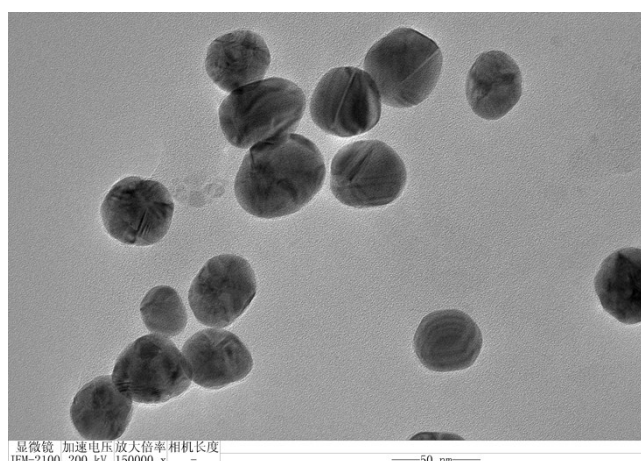

Fig. S2. TEM micrograph of AgNPs.

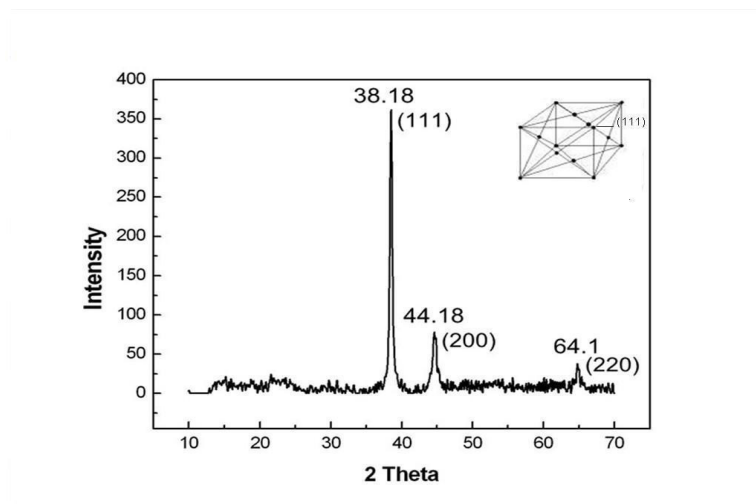

Fig. S3. XRD pattern of AgNPs.

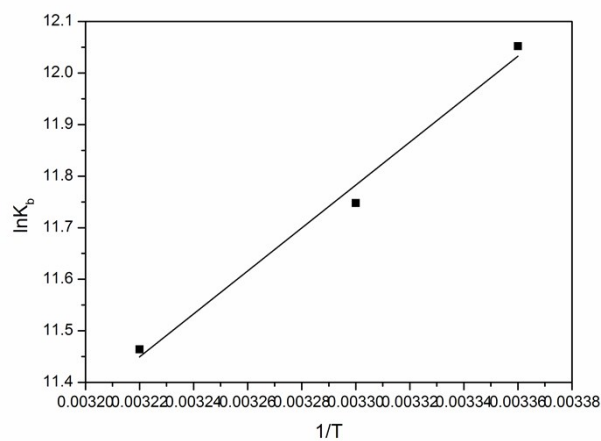

Fig. S4. Van't Hoff plots of the BSA/ AgNPs system.

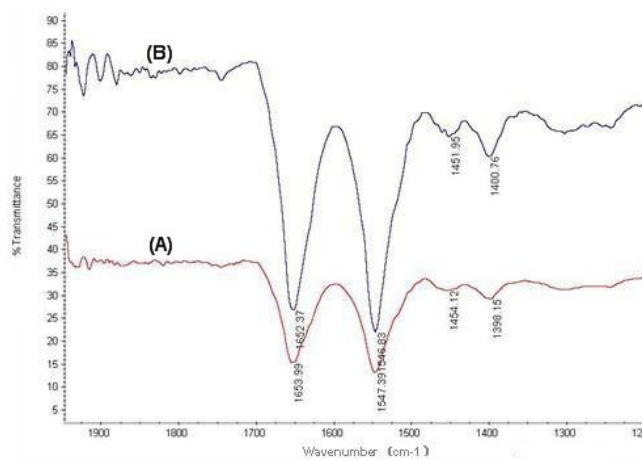

Fig. S5. FT-IR spectra of free BSA and difference spectra (AgNPs-BSA) at pH=7.4.

$C(\text{BSA}) = 1.0 \times 10^{-4} \text{ M}$ ,  $C(\text{AgNPs}) = 5.0 \times 10^{-12} \text{ M}$ .
